# Supplementary material
Source: publisher figshare collection journal article supplement (https://frontiersin.figshare.com/ndownloader/files/22677410)
Supplement: Supplementary file 1 [file 22677410]

| Parameter | Treatment | Time | Forest | Treatment: Time | Treatment: Forest | Time: Forest | Treatment: Time: Forest |
| --- | --- | --- | --- | --- | --- | --- | --- |
| Soil water content (%) | *** |  | *** |  |  |  | * |
| Soluble P (µg P g-1 soil DM) a | + |  | *** |  |  |  |  |
| Microbial P (µg P g-1 soil DM) a | + | * | *** |  |  |  |  |
| Microbial PLFA (nmol PLFA g-1 soil DM) | * | * | ** |  |  | * |  |
| Fungal PLFA (nmol PLFA g-1 soil DM) | *** | * | * |  |  | + |  |
| Bacterial PLFA (nmol PLFA g-1 soil DM) | * | * | ** |  |  | ** |  |
| Fungal:bacterial ratio b | *** |  | ** |  |  | * |  |
| EM fungi (% OTU) a | *** | ** | * | + | ** | + | *** |
| SAP fungi (% OTU) | *** | ** | * | * | ** |  | *** |
| Fungi with unknown EM status (% OTU) a | ** |  |  |  |  |  |  |
| Other fungi (% OTU) a | + | *** | *** |  | ** |  | ** |
| Unclassified fungi (% OTU) b |  |  | ** |  |  | + | ** |
| EMF:SAP ratio b | *** | *** | * | ** | ** |  | *** |
| Acid Phosphomonoesterase (µg Phenol g-1 soil DM 3 h-1) b |  | *** | *** |  |  |  |  |
| Specific Acid Phosphomonoesterase (µg Phenol nmol PLFAmic-1 3 h-1) b |  |  |  |  |  | *** |  |
| Phosphodiesterase (µg p-Nitrophenol g-1 soil DM h-1) | *** | *** | *** | *** | *** | * | * |
| Specific Phosphodieserase (µg p-Nitrophenol nmol PLFAmic-1 h-1) a |  | + | *** |  |  | * |  |

**Supplementary Table S1**. Results of the nlme-Model for the IGTs including all sampling dates. Level of significance: *** is *p* < 0.001, ** is *p* < 0.01, * is *p* < 0.05 and + is *p* < 0.1.

a square-root transformation, b log transformation
